# Supplementary material
Source: ML conference proceedings conference paper supplement (https://www.ecva.net/papers/eccv_2022/papers_ECCV/html/136770672_ECCV_2022_paper.php)
Supplement: Supplementary file 1 [file 136770672-supp.zip]

# FlowFormer: A Transformer Architecture for Optical Flow – Supplementary Materials

Zhaoyang Huang<sup>1,3\*</sup>, Xiaoyu Shi<sup>1,3\*</sup>, Chao Zhang<sup>2</sup>, Qiang Wang<sup>2</sup>, Ka Chun Cheung<sup>3</sup>, Hongwei Qin<sup>4</sup>, Jifeng Dai<sup>4</sup>, and Hongsheng Li<sup>1†</sup>

<sup>1</sup>Multimedia Laboratory, The Chinese University of Hong Kong

<sup>2</sup>Samsung Telecommunication Research

<sup>3</sup>NVIDIA AI Technology Center <sup>4</sup>SenseTime Research

{drinkingcoder@link, xiaoyushi@link, hsli@ee}.cuhk.edu.hk

## 1 More Ablation Studies

| Intra. | Inter. | Sintel (train) |       | Kitti (train) |        | Params. |
|--------|--------|----------------|-------|---------------|--------|---------|
|        |        | Clean          | Final | F1-epe        | F1-all |         |
| Trans  | Trans  | 1.20           | 2.85  | 4.57          | 15.46  | 15.2M   |
| MLP    | Trans  | 1.20           | 2.67  | 5.01          | 16.81  | 15.2M   |
| Trans  | Conv   | 1.23           | 2.72  | 4.73          | 15.87  | 15.1M   |
| MLP    | Conv   | 1.22           | 2.71  | 4.88          | 17.23  | 15.1M   |

Table 1: Ablation study on the alternative-group transformer (AGT) layer. For intra-cost-map aggregation layer (Intra.), we replace transformer (Trans) with MLP-Mixer [4] block (MLP). For inter-cost-map aggregation layer (Inter.), we replace transformer with ConvNeXt [3] block (Conv).

As shown in Table 1, we conduct additional ablation experiments on the alternative-group transformer (AGT) layer. For intra-cost-map aggregation layer, since the number and dimension of latent cost tokens are fixed, we test on replacing our design with MLP-Mixer [4] (2nd row), which is a state-of-the-art MLP-based architecture. We also substitute ConvNeXt [3] for transformer in inter-cost-map aggregation (3rd row). Furthermore, we replace both transformers with MLP and ConvNext (4th row). Replacing transformer layers leads to slightly better performance on Sintel final pass, while brings a clear drop on KITTI. Therefore, we adopt the proposed full transformer architecture as our final model.

## 2 Tile with Gaussian Weights

Since positional encodings used in transformers are sensitive to image size and the size of an image pair for test ( $H_{test} \times W_{test}$ ) might be different from those

\*Zhaoyang Huang and Xiaoyu Shi assert equal contributions.

†Corresponding author: Hongsheng Li

of the training images,  $(H_{train} \times W_{train})$ , we crop the test image pair according to the training size and estimate flows for patch pairs separately, and then tile the flows to obtain a complete flow map following a similar strategy proposed in Perceiver IO [1]. Specifically, we crop the image pair into four evenly-spaced tiles, i.e.,  $H_{train} \times W_{train}$  image tiles starting at  $(0, 0)$ ,  $(0, W_{test} - W_{train})$ ,  $(H_{test} - H_{train}, 0)$ , and  $(H_{test} - H_{train}, W_{test} - W_{train})$ , respectively. For each pixel that is covered by several tiles, we compute its output flow  $\mathbf{f}$  by blending the predicted flows  $\mathbf{f}_i$  with weighted averaging:

$$\mathbf{f} = \frac{\sum_i w_i \mathbf{f}_i}{\sum_i w_i}, \quad (1)$$

where  $w_i$  is the weight of the  $i$ -th tile for the pixel. We compute the  $H_{train} \times W_{train}$  weight map according to pixels’ normalized distances  $d_{u,v}$  to the tile center:

$$\begin{aligned} d_{u,v} &= \|(u/H_{train} - 0.5, v/W_{train} - 0.5)\|_2, \\ w_{u,v} &= g(d_{u,v}; \mu = 0, \sigma = 0.05), \end{aligned} \quad (2)$$

where  $(u, v)$  denote a pixel’s 2D coordinate. We use a Gaussian-like  $g$  as the weighting function to obtain smoothly blended results. We use this weight map for all the tiles.

### 3 Training Image Size Details

We train FlowFormer with image size of  $368 \times 498$  on FlyingChairs and  $432 \times 960$  on the following training stages, i.e., FlyingThings, Sintel, and KITTI. As the height of images in KITTI only ranges from 374 to 375, we train another FlowFormer model, dubbed as *FlowFormer#*, and evaluate it on the KITTI-15 training set to obtain better performance. Following GMA [2], *FlowFormer#* is trained with  $368 \times 498$  image size on FlyingChairs and  $400 \times 720$  image size on FlyingThings, which achieves 4.09 F1-epe and 14.72 F1-all on the KITTI training set as presented in the Table 1 in the original paper.

## References

1. Jaegle, A., Borgeaud, S., Alayrac, J.B., Doersch, C., Ionescu, C., Ding, D., Koppula, S., Zoran, D., Brock, A., Shelhamer, E., et al.: Perceiver io: A general architecture for structured inputs & outputs. arXiv preprint arXiv:2107.14795 (2021)
2. Jiang, S., Campbell, D., Lu, Y., Li, H., Hartley, R.: Learning to estimate hidden motions with global motion aggregation. arXiv preprint arXiv:2104.02409 (2021)
3. Liu, Z., Mao, H., Wu, C., Feichtenhofer, C., Darrell, T., Xie, S.: A convnet for the 2020s (2022)
4. Tolstikhin, I., Houlsby, N., Kolesnikov, A., Beyer, L., Zhai, X., Unterthiner, T., Yung, J., Keysers, D., Uszkoreit, J., Lucic, M., Dosovitskiy, A.: Mlp-mixer: An all-mlp architecture for vision (2021)
